# Supplementary material
Source: PubMed Central journal article supplement (PMC4079120)
Supplement: NIHMS467326-supplement-1_si_001.pdf [file NIHMS467326-supplement-1_si_001.pdf]

## **Optically Selective Two-photon Uncaging of Glutamate at 900 nm.**

Jeremy P. Olson<sup>1</sup>, Hyung-Bae Kwon<sup>2</sup>, Kevin T. Takasaki<sup>2</sup>, Chiayu Q. Chiu<sup>3</sup>,  
Michael J. Higley<sup>3</sup>, Bernardo L. Sabatini<sup>2</sup> and Graham C.R. Ellis-Davies<sup>1\*</sup>.

<sup>1</sup>Department of Neuroscience, Mount Sinai School of Medicine, New York, NY 10029, USA. <sup>2</sup>Department of Neurobiology, Howard Hughes Medical Institute, Harvard Medical School, Cambridge, MA 02115, USA. <sup>3</sup>Department of Neurobiology and Program in Cellular Neuroscience, Neurodegeneration and Repair, Yale University School of Medicine, New Haven, CT 06510. USA.

\* correspondence: [graham.davies@mssm.edu](mailto:graham.davies@mssm.edu)

Supporting Information.

Chemical synthesis of new compounds.

**4-(((tert-butyldimethylsilyl)oxy)methyl)-7-(diethylamino)-2H-chromen-2-one**

**(1):** To a solution of 7-(diethylamino)-4-(hydroxymethyl)-2H-chromen-2-one (0.495 g, 2.0 mmol, 1 eq) in dichloromethane (25 mL) was added tert-butyldimethylsilyl chloride (0.362 g, 2.4 mmol, 1.2 eq), followed by triethylamine (0.304 g, 3.0 mmol, 1.5 eq) and dimethylaminopyridine (73 mg, 0.6 mmol, 0.05 eq). The resulting solution was stirred for 3 hours, then quenched with sat. NH<sub>4</sub>Cl and extracted into ethyl acetate. The combined organics were dried over MgSO<sub>4</sub>, filtered and concentrated to obtain the crude product. The crude material was then purified by column chromatography (silica, 9:1 Hexanes: Ethyl Acetate) to obtain **1** in 83% yield (0.602 g, 1.67 mmol) as an off-white solid. <sup>1</sup>H NMR (300 MHz, CDCl<sub>3</sub>) δ: 7.25 (d, 1H, J = 9.0 Hz), 6.52 (m, 2H), 6.28 (s, 1H), 4.81 (s, 2H), 3.40 (q, 4H, J = 7.0 Hz), 1.20 (t, 6H, J = 7.0 Hz), 0.96 (s, 9H), 0.14 (s, 6H); <sup>13</sup>C NMR (75 MHz, CDCl<sub>3</sub>) δ: 162.4, 155.9, 154.5, 150.2, 123.8, 108.2, 106.2, 105.4, 97.8, 61.1, 44.7, 25.9, 18.5, 12.5, -5.2; LCMS ((Agilent Jet Stream) m/z calc'd for C<sub>20</sub>H<sub>31</sub>NO<sub>3</sub>Si [M+H]<sup>+</sup> 362.2146, found 362.2144.

**3-bromo-4-(((tert-butyldimethylsilyl)oxy)methyl)-7-(diethylamino)-2H-**

**chromen-2-one (2):** 4-(((tert-butyldimethylsilyl)oxy)methyl)-7-(diethylamino)-2H-chromen-2-one (**1**) (2.28g, 6.31 mmol, 1 eq) was dissolved in acetonitrile (40 mL) and treated with N-Bromosuccinimide (1.24 g, 6.94 mmol, 1.1 eq).

Ammonium acetate (49 mg, 0.631 mmol, 0.1 eq) was then added and the reaction

was stirred for 1 hour at which time the reaction was then poured into H<sub>2</sub>O and extracted into ethyl acetate. The combined organics were dried over MgSO<sub>4</sub>, filtered and concentrated to obtain the crude product. The crude material was then purified by column chromatography (silica, 4:1 Hexanes: Ethyl Acetate) to obtain 2 in 65% yield (1.81 g, 4.10 mmol) as a yellow solid. <sup>1</sup>H NMR (300 MHz, CDCl<sub>3</sub>) δ: 7.75 (d, 1H, J = 9.0 Hz), 6.60 (dd, 1H, J = 9.0 Hz, 3.0 Hz), 6.47 (d, 1H, J = 3.0 Hz), 4.99 (s, 2H), 3.40 (q, 4H, J = 7.0 Hz), 1.20 (t, 6H, J = 7.0 Hz), 0.90 (s, 9H), 0.13 (s, 6H); <sup>13</sup>C NMR (75 MHz, CDCl<sub>3</sub>) δ: 158.3, 154.8, 151.2, 150.4, 127.2, 108.8, 107.9, 104.6, 96.9, 63.2, 44.8, 25.9, 18.3, 12.5, -4.9; LCMS (Agilent Jet Stream) m/z calc'd for C<sub>20</sub>H<sub>30</sub>BrNO<sub>3</sub>Si [M+H]<sup>+</sup> 442.1233, found 442.1233.

**(E)-tert-butyl 3-(4-(((tert-butyl dimethylsilyl)oxy)methyl)-7-(diethylamino)-2-oxo-2H-chromen-3-yl)acrylate (3):** A solution of 3-bromo-4-(((tert-butyl dimethylsilyl)oxy)methyl)-7-(diethylamino)-2H-chromen-2-one (2) (1.81 g, 4.11 mmol, 1eq), and tert-Butyl acrylate (1.58 g, 12.33 mmol, 3eq) in dimethylformamide (40 mL) was degassed for 10 minutes, then treated with lithium chloride (0.296 g, 6.99 mmol, 1.7eq), sodium bicarbonate (1.04 g, 12.33 mmol, 3 eq), and tetrabutylammonium chloride (1.23 g, 4.52 mmol, 1.1 eq). The resulting suspension was degassed for 5 minutes, then treated with palladium acetate (46 mg, 0.206 mmol, 5 mol%) and heated to 110 °C for 30 min. The reaction was then cooled to room temperature poured into H<sub>2</sub>O and extracted into ethyl acetate. The combined organics were dried over MgSO<sub>4</sub>, filtered and concentrated to obtain the crude product. The crude material was then purified by column chromatography (silica, 9:1 Hexanes: Ethyl Acetate) to obtain 3 in 68% yield (1.35 g, 2.76 mmol) as a bright yellow solid. <sup>1</sup>H NMR (300 MHz, CDCl<sub>3</sub>) δ:

7.75 (d, 1H, J = 16.0 Hz), 7.65 (d, 1H, J = 9.0 Hz), 7.00 (d, 1H, J = 16.0 Hz), 6.61 (dd, 1H, J = 9.0 Hz, 3.0 Hz), 6.47 (d, 1H, J = 3.0 Hz), 4.90 (s, 2H), 3.42 (q, 4H, J = 7.0 Hz), 1.51 (s, 9H), 1.22 (t, 6H, J = 7.0 Hz), 0.90 (s, 9H), 0.16 (s, 6H); <sup>13</sup>C NMR (75 MHz, CDCl<sub>3</sub>) δ: 166.7, 160.4, 155.6, 151.1, 150.8, 134.6, 127.3, 124.6, 113.5, 109.0, 108.2, 96.9, 79.9, 57.6, 44.8, 28.3, 25.8, 18.3, 12.6, -5.0; LCMS (Agilent Jet Stream) m/z calc'd for C<sub>27</sub>H<sub>41</sub>NO<sub>5</sub>Si [M+H]<sup>+</sup> 488.2827, found 488.2825.

**(E)-3-(4-(((tert-butyl dimethylsilyl)oxy)methyl)-7-(diethylamino)-2-oxo-2H-chromen-3-yl)acrylic acid (4):** (E)-tert-butyl 3-(4-(((tert-

butyl dimethylsilyl)oxy)methyl)-7-(diethylamino)-2-oxo-2H-chromen-3-yl)acrylate (**3**) (0.550 g, 1.12 mmol) was dissolved in dichloromethane (5 mL), and trifluoroacetic acid (5 mL) and stirred for 30 min. The solvent was then removed and the crude material was redissolved in dichloromethane and concentrated to obtain (**4**) in 98% yield (0.471 g, 1.09 mmol) as an orange solid.

<sup>1</sup>H NMR (300 MHz, CDCl<sub>3</sub>) δ: 8.00 (d, 1H, J = 15.3 Hz), 7.66 (d, 1H, J = 9.3 Hz), 7.17 (d, 1H, J = 15.6 Hz), 6.64 (dd, 1H, J = 9.0, 2.1 Hz), 6.48 (d, 1H, J = 2.7 Hz), 4.93 (s, 2H), 3.44 (q, 4H, J = 7.0 Hz), 1.23 (t, 6H, J = 7.0 Hz), 0.91 (s, 9H), 0.17 (s, 6H); <sup>13</sup>C NMR (75 MHz, CDCl<sub>3</sub>) δ: 172.2, 160.3, 156.0, 152.6, 151.2, 138.3, 127.5, 120.6, 112.8, 109.4, 108.3, 97.2, 57.5, 45.0, 25.8, 18.3, 12.6, -5.0; LCMS (Agilent Jet Stream) m/z calc'd for C<sub>23</sub>H<sub>33</sub>NO<sub>5</sub>Si [M+H]<sup>+</sup> 432.2201, found 432.2201.

**(E)-di-tert-butyl 2-(3-(4-(((tert-butyl dimethylsilyl)oxy)methyl)-7-**

**(diethylamino)-2-oxo-2H-chromen-3-yl)acrylamido)succinate (5):** A solution of L-Aspartic acid di-tertbutylester (278 mg, 1.14 mmol, 2 eq) and (E)-3-(4-(((tert-butyl dimethylsilyl)oxy)methyl)-7-(diethylamino)-2-oxo-2H-chromen-3-yl)acrylic acid (**4**) (245 mg, 0.567 mmol, 1 eq) in dichloromethane (15 mL) and acetonitrile

(15 mL) was treated with 1-ethyl-3-(3-dimethylaminopropyl) carbodiimide (119 mg, 0.624 mmol, 1.1 eq). The reaction was stirred for 16 hours, then concentrated to obtain the crude product. The crude material was then purified by column chromatography (silica, 2:1 Hexanes: Ethyl Acetate) to obtain **5** in 55% yield (204 mg, 0.309 mmol) as a yellow solid. <sup>1</sup>H NMR (300 MHz, CDCl<sub>3</sub>) δ: 7.85 (d, 1H, J = 15.0 Hz), 7.69 (d, 1H, J = 9.3 Hz), 7.24 (d, 1H, J = 9.3 Hz), 6.62 (m, 2H), 6.47 (d, 1H, J = 3.0 Hz), 4.95 (s, 2H), 4.85 (m, 1H), 3.44 (q, 4H, J = 7.0 Hz), 2.85 (dq, 2H, J = 50.1 Hz, 17.1 Hz, 4.5 Hz), 1.46 (s, 9H), 1.45 (s, 9H), 1.22 (t, 6H, J = 7.0 Hz), 0.89 (s, 9H), 0.16 (s, 6H); <sup>13</sup>C NMR (75 MHz, CDCl<sub>3</sub>) δ: 170.1, 169.6, 165.9, 160.4, 155.6, 151.5, 150.8, 132.5, 127.5, 124.2, 112.9, 96.9, 82.1, 81.4, 57.5, 49.2, 44.8, 37.7, 28.1, 27.9, 25.9, 18.3, 12.6, -5.0; LCMS (Agilent Jet Stream) m/z calc'd for C<sub>35</sub>H<sub>54</sub>N<sub>2</sub>O<sub>8</sub>Si [M+H]<sup>+</sup> 659.3722, found 659.3723.

**(E)-di-tert-butyl 2-(3-(7-(diethylamino)-4-(hydroxymethyl)-2-oxo-2H-chromen-3-yl)acrylamido)succinate (6):** To a solution of (E)-di-tert-butyl 2-(3-(4-(((tert-butyl)dimethylsilyl)oxy)methyl)-7-(diethylamino)-2-oxo-2H-chromen-3-yl)acrylamido)succinate (**5**) (83 mg, 0.126 mmol, 1 eq) in tetrahydrofuran (5 mL) was added tetrabutylammonium fluoride (1M in THF) (0.189 mL, 0.189 mmol, 1.5 eq). The reaction was stirred for 15 minutes, then quenched with sat. NH<sub>4</sub>Cl and extracted into ethyl acetate. The combined organics were dried over MgSO<sub>4</sub>, filtered and concentrated to obtain the crude product. The crude material was then purified by column chromatography (silica, 1:3 Hexanes: Ethyl Acetate) to obtain **6** in 83% yield (57 mg, 0.105 mmol) as a yellow solid. <sup>1</sup>H NMR (300 MHz, CDCl<sub>3</sub>) δ: 7.86 (d, 1H, J = 15.0 Hz), 7.72 (d, 1H, J = 9.3 Hz), 7.28 (d, 1H, J = 14.7 Hz), 6.75 (d, 1H, J = 8.1 Hz), 6.62 (dd, 1H, J = 9.2 Hz, 2.4 Hz), 6.47 (d, 1H, J = 2. Hz),

4.97 (s, 2H), 4.83 (m, 1H), 3.44 (q, 4H, J = 7.0 Hz), 2.85 (dq, 2H, J = 50.1 Hz, 17.1 Hz, 4.5 Hz), 1.46 (s, 9H), 1.44 (s, 9H), 1.22 (t, 6H, J = 7.0 Hz); <sup>13</sup>C NMR (75 MHz, CDCl<sub>3</sub>) δ: 170.0, 169.5, 166.5, 160.5, 155.7, 151.7, 150.9, 132.8, 127.3, 123.8, 113.1, 109.3, 108.2, 97.0, 82.2, 81.4, 56.4, 49.4, 44.9, 37.6, 29.7, 28.1, 27.9, 12.6 ; LCMS (Agilent Jet Stream) m/z calc'd for C<sub>29</sub>H<sub>40</sub>N<sub>2</sub>O<sub>8</sub> [M+H]<sup>+</sup> 545.2857, found 545.2859.

**(E)-1-tert-butyl 5-((3-(3-((1,4-di-tert-butoxy-1,4-dioxobutan-2-yl)amino)-3-oxoprop-1-en-1-yl)-7-(diethylamino)-2-oxo-2H-chromen-4-yl)methyl) 2-((tert-butoxycarbonyl)amino)pentanedioate:** A solution of (E)-di-tert-butyl 2-(3-(7-(diethylamino)-4-(hydroxymethyl)-2-oxo-2H-chromen-3-yl) acrylamido) succinate (217 mg, 0.398 mmol, 1 eq) in dichloromethane (15 mL) was treated with Boc-L-glutamic acid 1-tert-butyl ester (181 mg, 0.598 mmol, 1.5 eq), then 1-ethyl-3-(3-dimethylaminopropyl) carbodiimide (479 mg, 2.49 mmol, 6.25 eq) and cat. dimethylaminopyridine (15 mg). The reaction was stirred for 16 hours, then poured into water and extracted into ethyl acetate. The combined organics were dried over MgSO<sub>4</sub>, filtered and concentrated to obtain the crude product. The crude material was then purified by column chromatography (silica, 1:1 Hexanes: Ethyl Acetate) to obtain (E)-1-tert-butyl 5-((3-(3-((1,4-di-tert-butoxy-1,4-dioxobutan-2-yl)amino)-3-oxoprop-1-en-1-yl)-7-(diethylamino)-2-oxo-2H-chromen-4-yl)methyl) 2-((tert-butoxycarbonyl)amino)pentanedioate in 69% yield (227 mg, 0.273 mmol) as a yellow solid. <sup>1</sup>H NMR (300 MHz, CDCl<sub>3</sub>) δ: 7.81 (d, 1H, J = 15.0 Hz), 7.52 (d, 1H, J = 9.3 Hz), 7.31 (d, 1H, J = 15.0 Hz), 6.68 (m, 2H), 6.47 (d, 1H, J = 2.4 Hz), 5.40 (s, 2H), 5.11 (d, 1H, J = 8.1 Hz), 4.82 (m, 1H), 4.15 (m, 1H), 3.44 (q, 4H, J = 7.2 Hz), 2.85 (dq, 2H, J = 50.1 Hz, 17.1 Hz, 4.5 Hz), 2.43 (m, 2H), 2.14 (m, 1H), 1.91 (m, 1H), 1.46 (s, 9H), 1.45 (s, 9H), 1.44 (s, 9H), 1.41 (s, 9H),

1.23 (t, 6H, J = 7.0 Hz);  $^{13}\text{C}$  NMR (75 MHz,  $\text{CDCl}_3$ )  $\delta$ : 171.9, 170.9, 169.9, 169.5, 165.7, 159.9, 155.3, 150.9, 146.3, 131.9, 126.6, 124.8, 114.6, 109.4, 107.7, 96.9, 82.0, 81.9, 81.3, 79.5, 57.6, 53.2, 49.2, 44.8, 37.6, 30.0, 28.2, 28.0, 27.9, 27.8, 12.5 ; LCMS (Agilent Jet Stream) m/z calc'd for  $\text{C}_{43}\text{H}_{63}\text{N}_3\text{O}_{13}$   $[\text{M}+\text{H}]^+$  830.4466, found 830.4469.

**(E)-2-(3-(4-(((4-amino-4-carboxybutanoyl)oxy)methyl)-7-(diethylamino)-2-oxo-2H-chromen-3-yl)acrylamido)succinic acid (7):** (E)-1-tert-butyl 5-((3-(3-((1,4-di-tert-butoxy-1,4-dioxobutan-2-yl)amino)-3-oxoprop-1-en-1-yl)-7-(diethylamino)-2-oxo-2H-chromen-4-yl)methyl) 2-((tert-butoxycarbonyl)amino)pentanedioate (50 mg, 0.602 mmol) was dissolved in dichloromethane (2 mL), and trifluoroacetic acid (6 mL) and stirred for 2.5 hours. The solvent was then removed and the crude material was redissolved in dichloromethane and concentrated to obtain the crude product. The crude product was purified by reverse phase HPLC (35%  $\text{CH}_3\text{CN}/0.1\%$  TFA in  $\text{H}_2\text{O}$ , Altima C18 column, then lyophilized to obtain 7 in 68% yield (23 mg, 0.041 mmol) as a yellow powder.  $^1\text{H}$  NMR (600 MHz,  $\text{CD}_3\text{OD}$ )  $\delta$ : 7.75 (d, 1H, J = 15.0 Hz), 7.70 (d, 1H, J = 9.6 Hz), 7.32 (d, 1H, J = 15.0 Hz), 6.79 (dd, 1H, J = 9.3 Hz, 2.4 Hz), 6.54 (d, 1H, J = 2.4 Hz), 5.49 (s, 2H), 4.02 (t, 1H, J = 7.2 Hz), 3.44 (q, 4H, J = 7.2 Hz), 2.85 (dq, 2H, J = 51.6 Hz, 16.8 Hz, 7.2 Hz), 2.60 (m, 2H), 2.26 (m, 1H), 2.17 (m, 1H), 1.25 (t, 6H, J = 7.2 Hz);  $^{13}\text{C}$  NMR (75 MHz,  $\text{CDCl}_3$ )  $\delta$ : 172.9, 171.8, 170.2, 167.8, 160.7, 155.8, 151.8, 147.8, 132.5, 126.9, 123.9, 113.5, 109.8, 107.6, 96.4, 57.7, 51.9, 49.2, 44.4, 35.6, 29.0, 25.2, 11.3; LCMS (Agilent Jet Stream) m/z calc'd for  $\text{C}_{26}\text{H}_{31}\text{N}_3\text{O}_{11}$   $[\text{M}+\text{H}]^+$  562.2031, found 562.2033. RP-HPLC; retention time= 14.38 min, 35%  $\text{CH}_3\text{CN}/0.1\%$  TFA in  $\text{H}_2\text{O}$ , Altima C-18 column

**Photochemical and physicochemical methods.** The quantum yield of uncaging was measured by comparative photolysis as described previously for other caged compounds<sup>22,23,29,30</sup>. Concentrations of RuBi-Glu and DEAC450-Glu were set to give an OD = 0.2 at 473 nm in a 1 mm cuvette. A defocused 473-nm laser with a diameter of 3 cm was used for irradiation of 100 $\mu$ L solutions of the caged compounds in phosphate buffer (100 mM) at pH 7.4. Inosine (0.5 mM) was also included in the photolysis reaction mixture, as a photochemically inert standard. RuBi-Glu has a quantum yield of photolysis of 0.13. Analysis of the time course of the reaction by HPLC showed that DEAC450-Glu was photolyzed 3 times greater than RuBi-Glu, giving a quantum yield of photolysis of 0.39 (n=4).

The solubility of DEAC450-Glu was determined by dissolving a known amount of compound in a defined volume of phosphate buffer at pH 7.4 to give a concentration of 7.5 mM. This solution was centrifuged at 13,500 rpm for 10 min. After removal of the supernatant, no pellet was visible.

The relative two-photon excitation efficiency of DEAC450 was determined by irradiation of a solution (0.02 mM) with mode-locked Ti:sapphire laser (Coherent Ultra II) through a 0.8 NA 40x lens on a Prairie Technologies Ultima two-photon microscope. Emitted fluorescence was detected after excitation at 720 nm and 900nm. Note, DEAC450 is non-fluorescent at 1000 nm.

**Physiology methods.** All animal handling was performed in accordance with guidelines approved by the Harvard and Yale Institutional Animal Care and Use Committees and federal guidelines. Brain slices were acutely isolated from mice as described previously.<sup>27,28</sup> Two-photon uncaging at visually spine heads defined was performed using custom-built microscopes and software as



described previously<sup>27,28</sup>. For uncaging experiments, the caged glutamate probes were applied using a puffer pipette positioned just above the brain slice<sup>26</sup>.

Dendrites filled with Alexa-594 were imaged at 1000 nm.

For determination of GABA-A receptor block, inhibitory postsynaptic currents were evoked using local electrical stimulation and compounds were bath applied at a range of concentrations (0.01-1.0 mM).

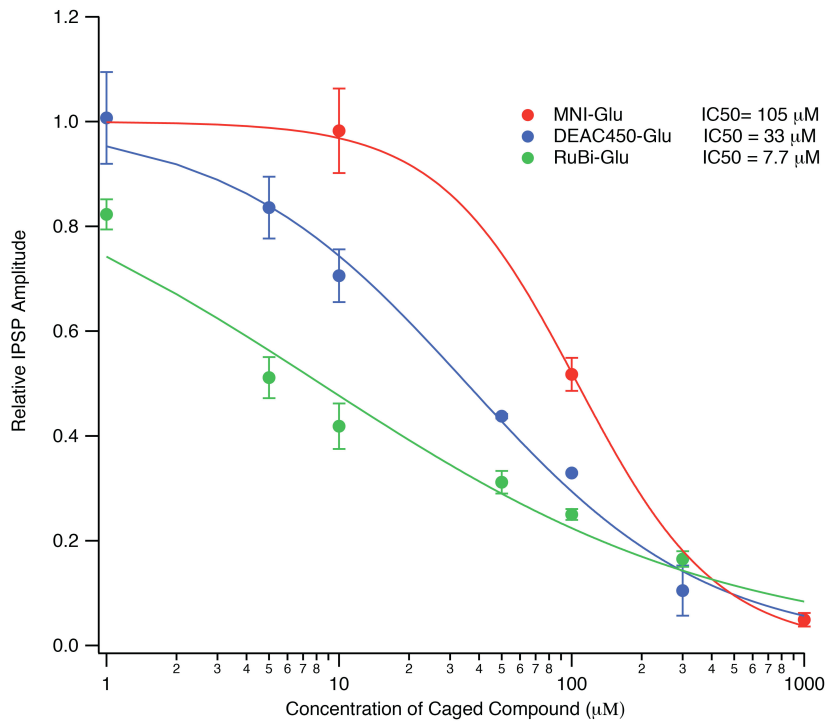

# Spectral data (scans of NMR and HR-MS).

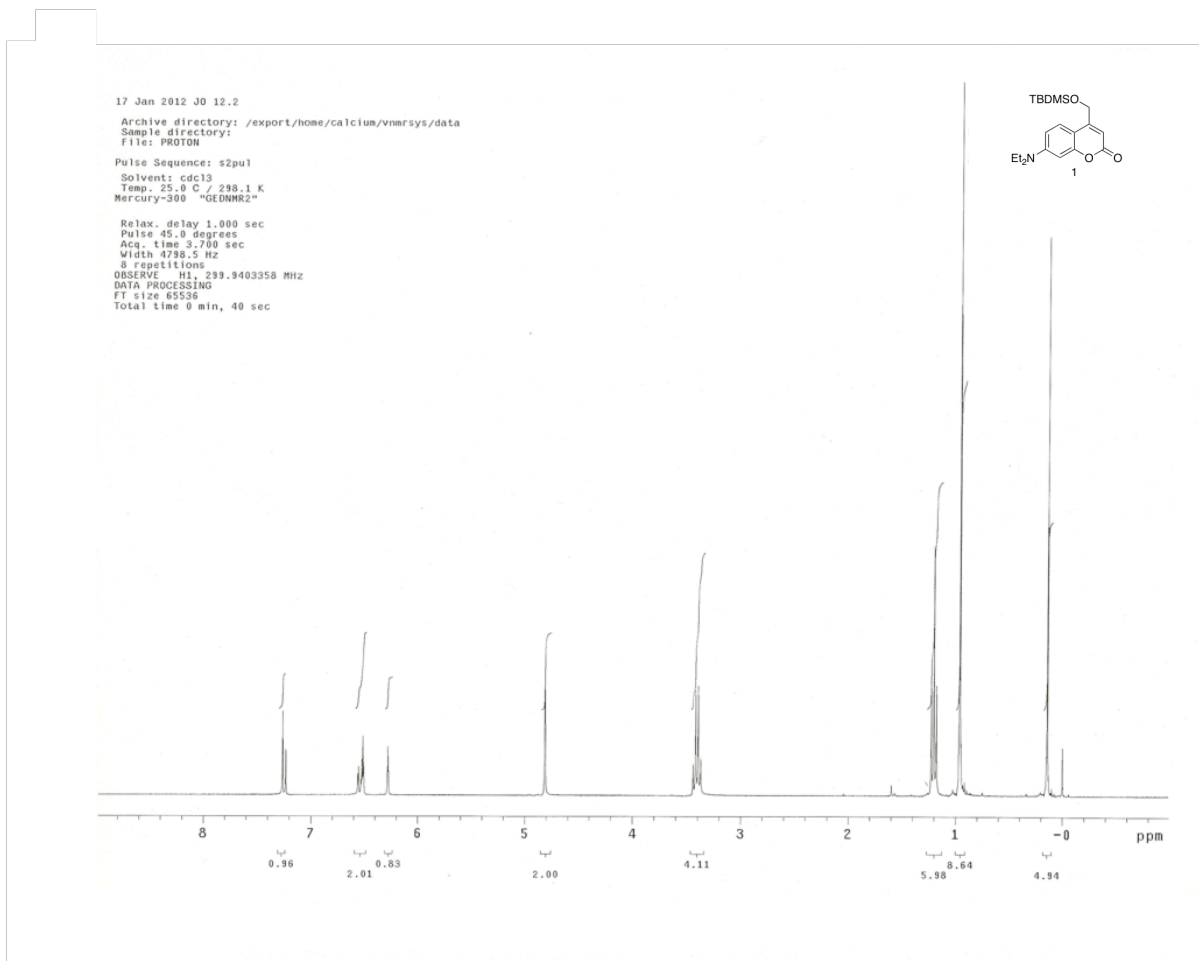

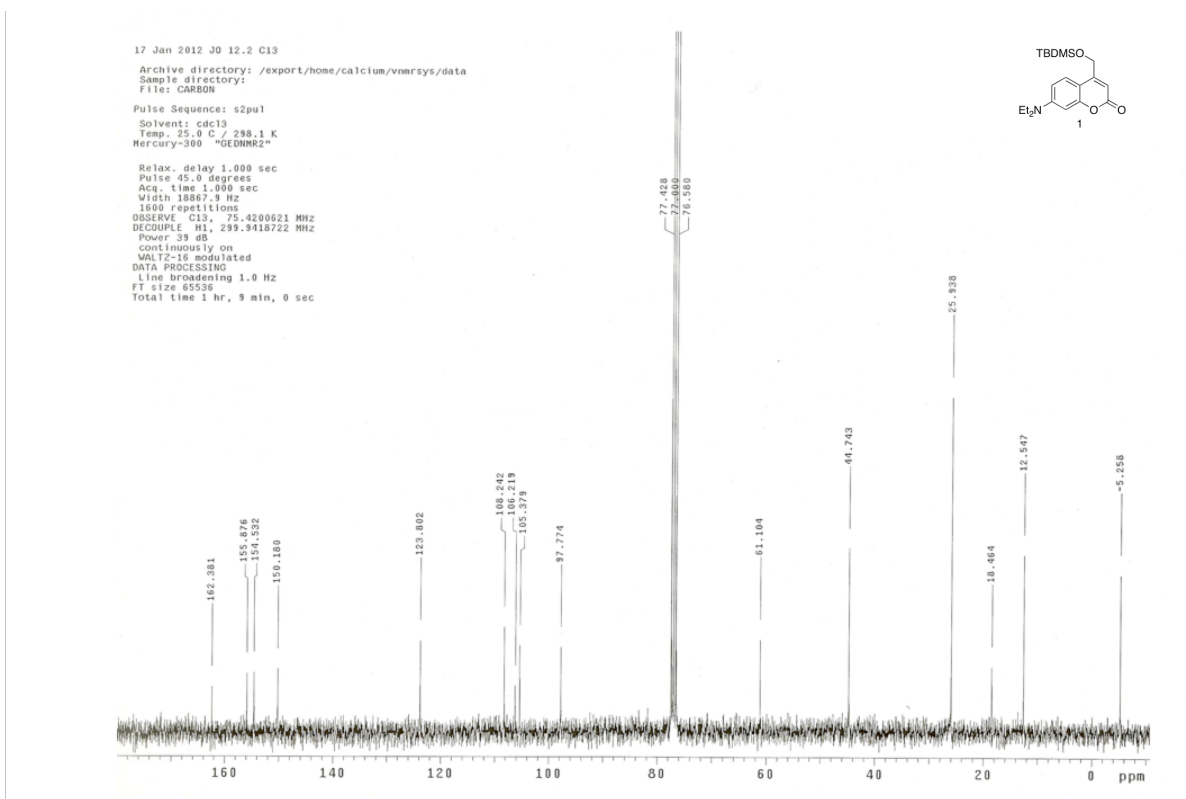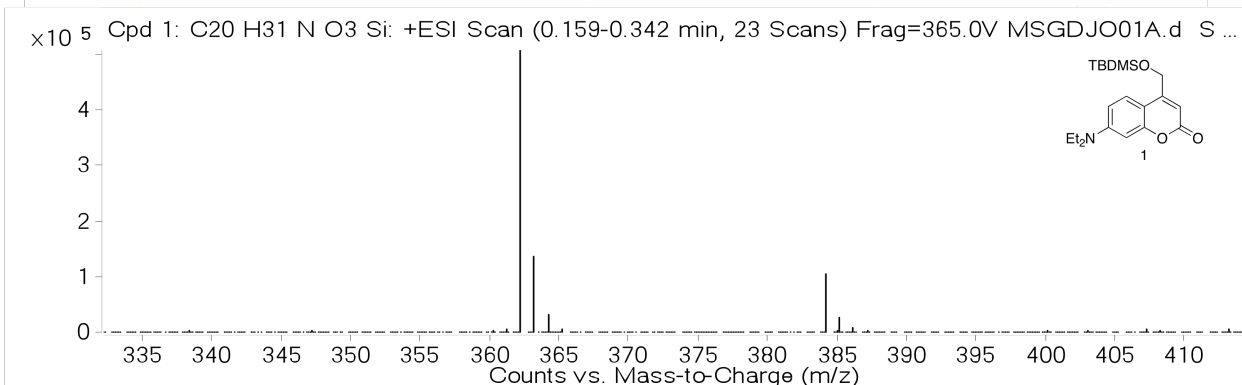

| <i>m/z</i> | Calc <i>m/z</i> | Diff(ppm) | <i>z</i> | Abund     | Formula                                                          | Ion                 |
|------------|-----------------|-----------|----------|-----------|------------------------------------------------------------------|---------------------|
| 362.2144   | 362.2146        | 0.41      | 1        | 508095.28 | C <sub>20</sub> H <sub>31</sub> N <sub>3</sub> O <sub>3</sub> Si | (M+H) <sup>+</sup>  |
| 363.2172   | 363.2172        | 0.02      | 1        | 134908.19 | C <sub>20</sub> H <sub>31</sub> N <sub>3</sub> O <sub>3</sub> Si | (M+H) <sup>+</sup>  |
| 364.2165   | 364.2161        | -1.07     | 1        | 30690.04  | C <sub>20</sub> H <sub>31</sub> N <sub>3</sub> O <sub>3</sub> Si | (M+H) <sup>+</sup>  |
| 365.2151   | 365.2176        | 6.78      | 1        | 4812.25   | C <sub>20</sub> H <sub>31</sub> N <sub>3</sub> O <sub>3</sub> Si | (M+H) <sup>+</sup>  |
| 366.2221   | 366.2196        | -6.74     | 1        | 662.06    | C <sub>20</sub> H <sub>31</sub> N <sub>3</sub> O <sub>3</sub> Si | (M+H) <sup>+</sup>  |
| 384.1964   | 384.1965        | 0.4       | 1        | 103681.56 | C <sub>20</sub> H <sub>31</sub> N <sub>3</sub> O <sub>3</sub> Si | (M+Na) <sup>+</sup> |
| 385.1998   | 385.1992        | -1.55     | 1        | 26934.23  | C <sub>20</sub> H <sub>31</sub> N <sub>3</sub> O <sub>3</sub> Si | (M+Na) <sup>+</sup> |
| 386.1997   | 386.198         | -4.22     | 1        | 6631.77   | C <sub>20</sub> H <sub>31</sub> N <sub>3</sub> O <sub>3</sub> Si | (M+Na) <sup>+</sup> |
| 387.1972   | 387.1996        | 6.1       | 1        | 1503.93   | C <sub>20</sub> H <sub>31</sub> N <sub>3</sub> O <sub>3</sub> Si | (M+Na) <sup>+</sup> |
| 388.2047   | 388.2016        | -7.98     | 1        | 379.76    | C <sub>20</sub> H <sub>31</sub> N <sub>3</sub> O <sub>3</sub> Si | (M+Na) <sup>+</sup> |

19 March 2012 J0 62.1  
Archive directory: /export/home/calciun/vnmrsvs/data  
Sample directory:  
File: PROTON  
Pulse Sequence: s2pul  
Solvent: CDCl3  
Temp. 25.0 C / 298.1 K  
Mercury-300 "GEDNRK2"  
Relax. delay 1.000 sec  
Pulse 45.0 degrees  
Acq. time 3.760 sec  
Width 4788.5 Hz  
8 repetitions  
OBSERVE H1 299.9403373 MHz  
DATA PROCESSING  
FT size 85538  
Total time 0 min, 40 sec

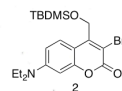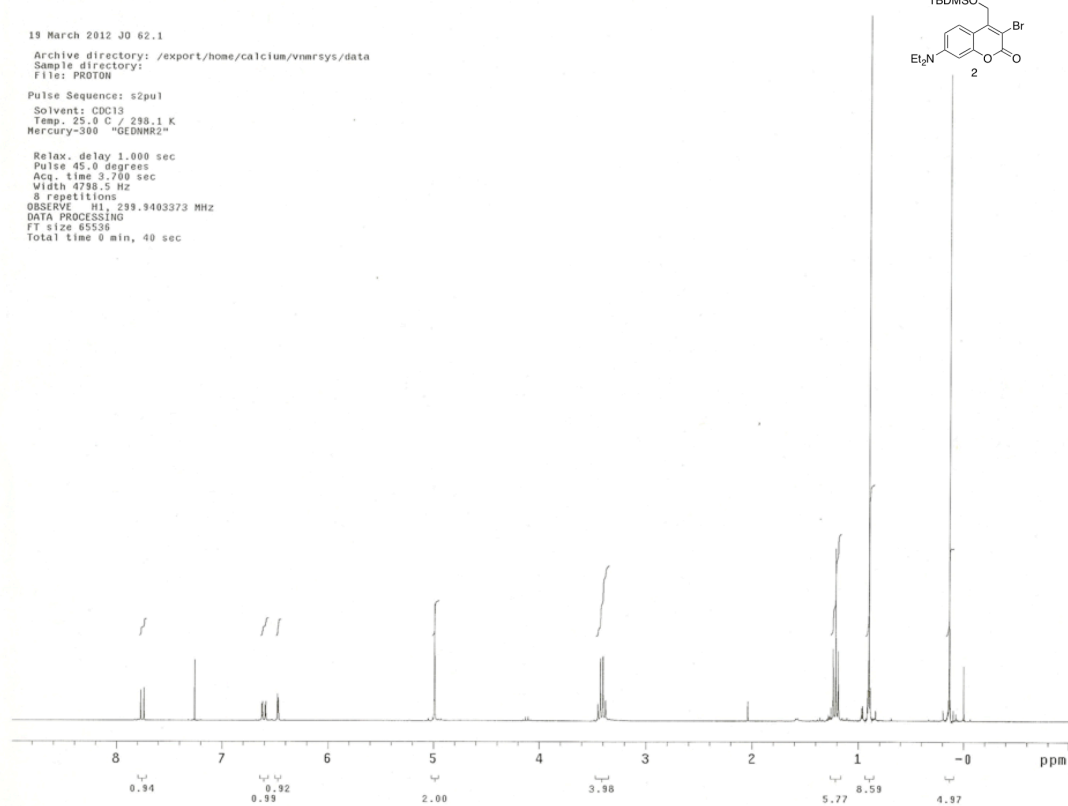

24 Feb 2012 Jo 62.1 C13  
 Archive directory: /export/home/calciun/vmrsys/data  
 Sample directory:  
 File: CARBON  
 Pulse Sequence: s2pul  
 Solvent: CDC13  
 Temp. 25.0 C / 298.1 K  
 Mercury-300 "QEDNHR2"  
 Relax. delay 1.000 sec  
 Pulse 45.0 degrees  
 Acq. time 1.000 sec  
 Width 18867.9 Hz  
 3276 repetitions  
 OBSERVE C13, 75.4200639 MHz  
 DECOUPLE H1, 299.9418722 MHz  
 Power 39 dB  
 continuously on  
 WALTZ-16 modulated  
 DATA PROCESSING  
 Line broadening 1.0 Hz  
 FT size 65536  
 Total time 2 hr, 52 min, 28 sec

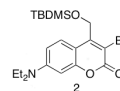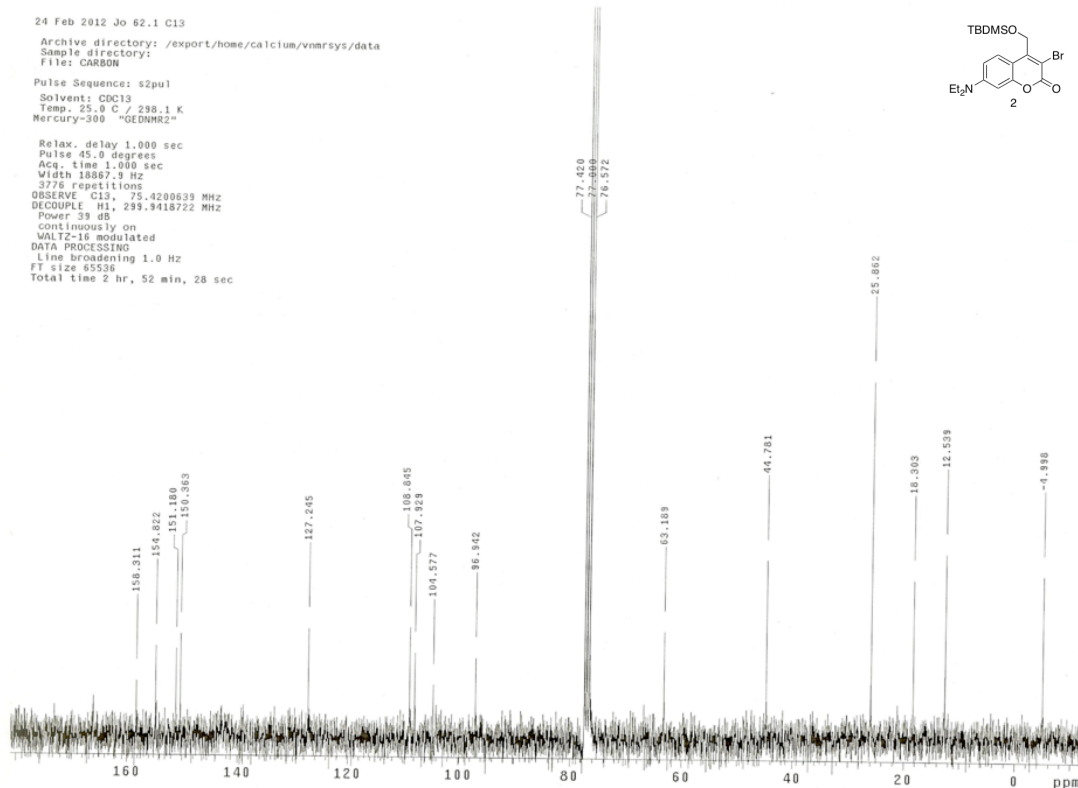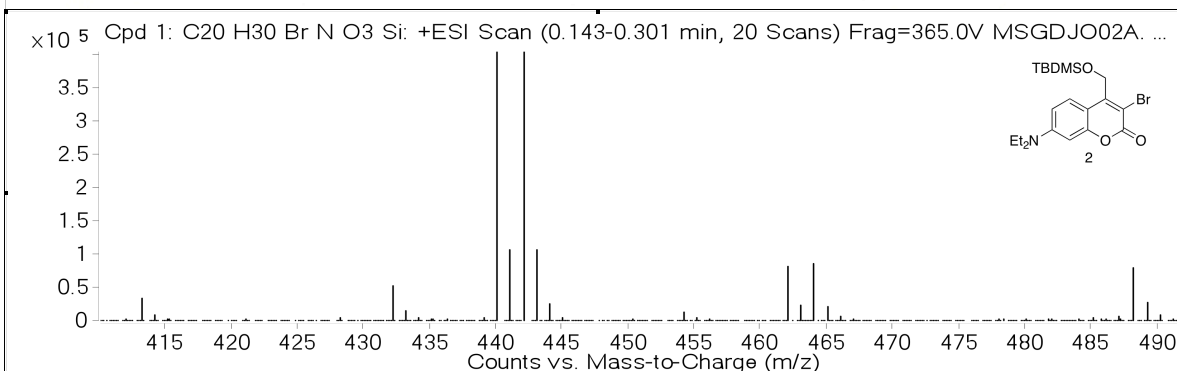

| m/z      | Calc m/z | Diff(ppm) | z | Abund     | Formula                                              | Ion                 |
|----------|----------|-----------|---|-----------|------------------------------------------------------|---------------------|
| 440.125  | 440.1251 | 0.15      | 1 | 402777.25 | C <sub>20</sub> H <sub>30</sub> BrNO <sub>3</sub> Si | (M+H) <sup>+</sup>  |
| 441.1275 | 441.1277 | 0.42      | 1 | 105154.92 | C <sub>20</sub> H <sub>30</sub> BrNO <sub>3</sub> Si | (M+H) <sup>+</sup>  |
| 442.1233 | 442.1233 | 0.14      | 1 | 403264.06 | C <sub>20</sub> H <sub>30</sub> BrNO <sub>3</sub> Si | (M+H) <sup>+</sup>  |
| 443.126  | 443.1258 | -0.43     | 1 | 105643.72 | C <sub>20</sub> H <sub>30</sub> BrNO <sub>3</sub> Si | (M+H) <sup>+</sup>  |
| 444.1253 | 444.1247 | -1.48     | 1 | 24863.38  | C <sub>20</sub> H <sub>30</sub> BrNO <sub>3</sub> Si | (M+H) <sup>+</sup>  |
| 462.1068 | 462.1071 | 0.53      | 1 | 81940.59  | C <sub>20</sub> H <sub>30</sub> BrNO <sub>3</sub> Si | (M+Na) <sup>+</sup> |
| 463.1095 | 463.1097 | 0.28      | 1 | 21944.5   | C <sub>20</sub> H <sub>30</sub> BrNO <sub>3</sub> Si | (M+Na) <sup>+</sup> |
| 464.1051 | 464.1053 | 0.37      | 1 | 85689.31  | C <sub>20</sub> H <sub>30</sub> BrNO <sub>3</sub> Si | (M+Na) <sup>+</sup> |
| 465.1076 | 465.1077 | 0.24      | 1 | 21001.67  | C <sub>20</sub> H <sub>30</sub> BrNO <sub>3</sub> Si | (M+Na) <sup>+</sup> |
| 466.1072 | 466.1066 | -1.33     | 1 | 5259.36   | C <sub>20</sub> H <sub>30</sub> BrNO <sub>3</sub> Si | (M+Na) <sup>+</sup> |

22 Feb 2012 10 54.1  
Archive directory: /export/home/calciun/vnmrsys/data  
Sample directory:  
File: PROTON  
Pulse Sequence: s2pu1  
Solvent: CDCl3  
Temp. 25.0 C / 298.1 K  
Mercury-300 "QEDMR2"  
Relax. delay 1.000 sec  
Pulse 45.0 degrees  
Acq. time 3.700 sec  
Width 4798.5 Hz  
S repetitions  
OBSERVE H1, 299.9403360 MHz  
DATA PROCESSING  
F1 size 65536  
Total time 0 min, 40 sec

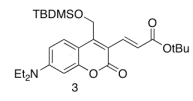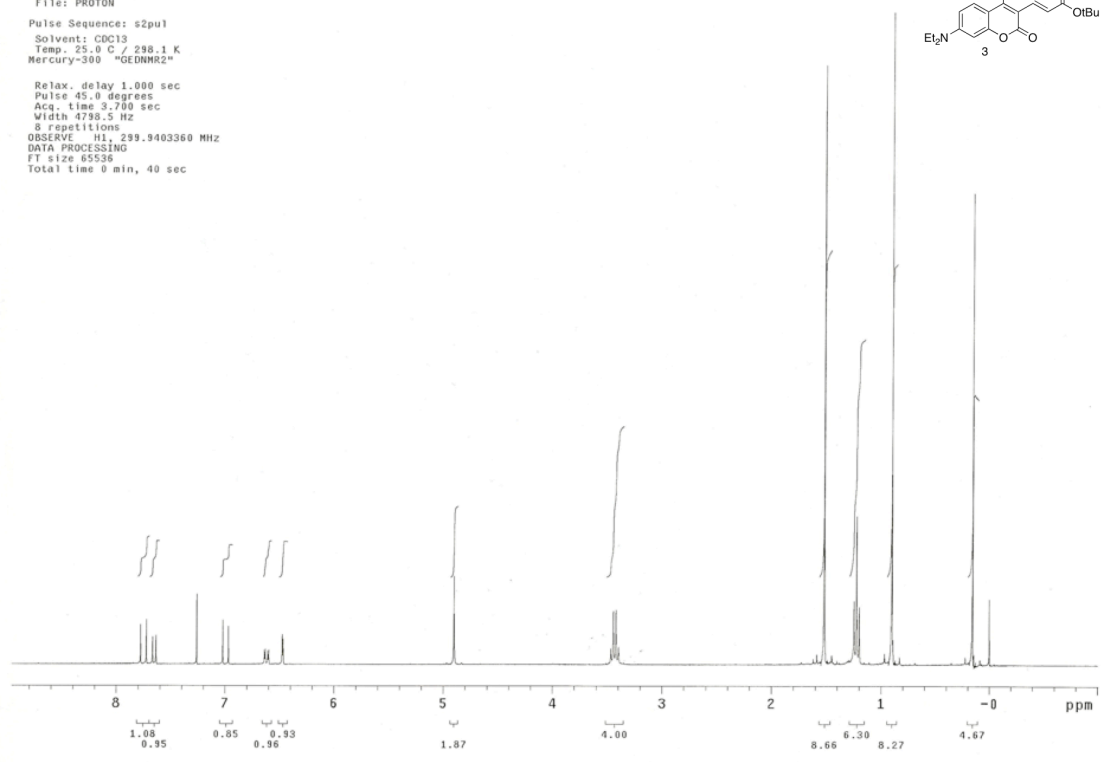

23 Feb 2012 J0 64.1 C13

Archive directory: /export/home/calculum/vnmrsys/data  
 Sample directory:  
 File: CARBON

Pulse Sequence: s2pul  
 Solvent: CDCl3  
 Temp: 25.0 C / 298.1 K  
 Mercury-300 "GEDNMR2"

Relax. delay 1.000 sec  
 Pulse 45.0 degrees  
 Acq. time 1.000 sec  
 Width 18667.9 Hz  
 3328 repetitions  
 OBSERVE C13, 75.4200650 MHz  
 DECODE H1, 299.9418722 MHz  
 Power 39 dB  
 continuously on  
 WALTZ-16 modulated  
 DATA PROCESSING  
 Line Broadening 1.0 Hz  
 FT size 65536  
 Total time 5 hr, 44 min, 54 sec

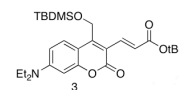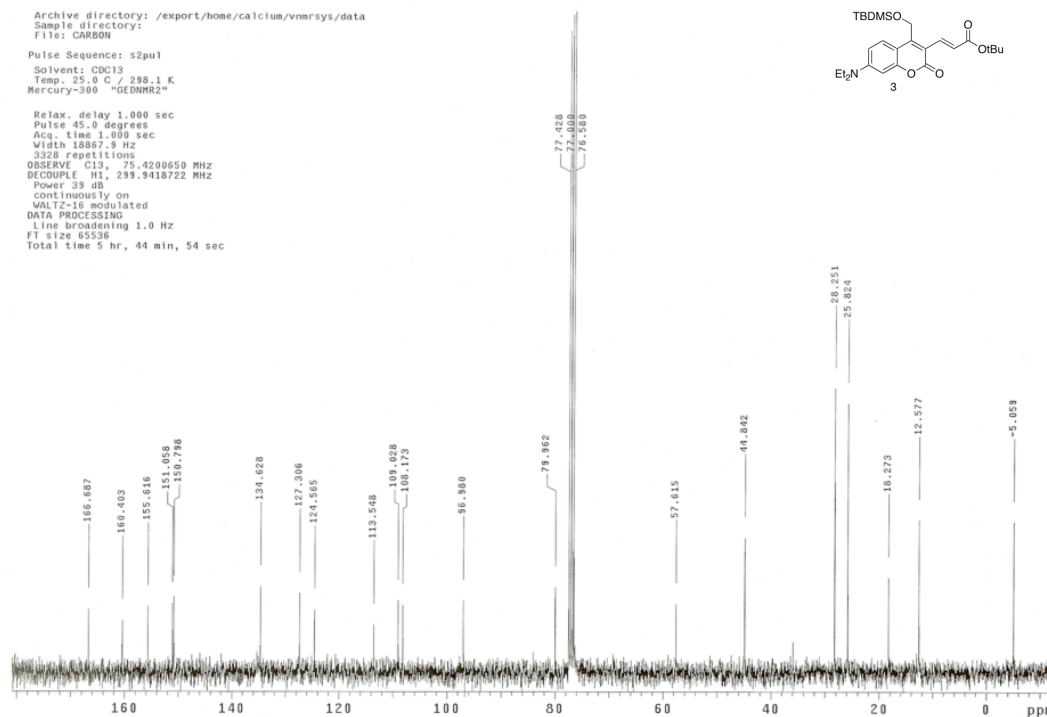

$\times 10^5$  Cpd 1: C27 H41 N O5 Si: +ESI Scan (0.144-0.302 min, 20 Scans) Frag=365.0V MSGDJO03A.d S ...

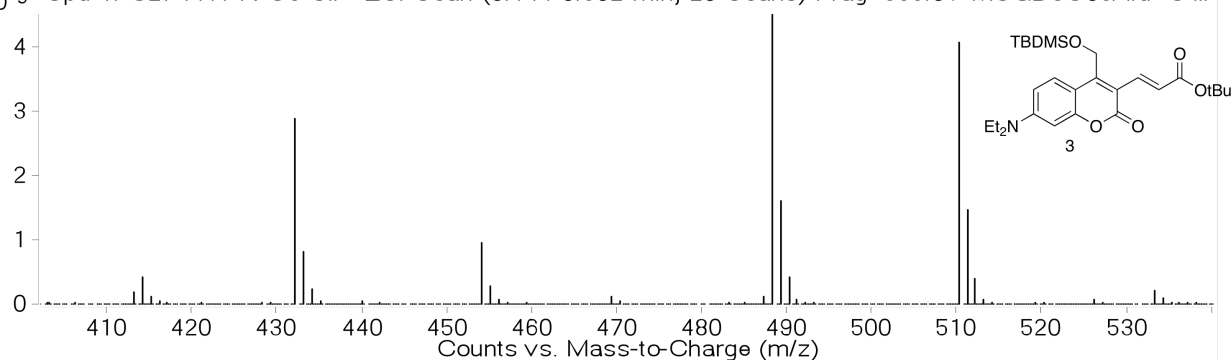

| <i>m/z</i> | Calc <i>m/z</i> | Diff(ppm) | <i>z</i> | Abund     | Formula     | Ion             |
|------------|-----------------|-----------|----------|-----------|-------------|-----------------|
| 432.2203   | 432.2201        | -0.58     | 1        | 287455.59 | C27H41NO5Si | (M+H)+[-C4H8]   |
| 433.2228   | 433.2228        | -0.04     | 1        | 82514.23  | C27H41NO5Si | (M+H)+[-C4H8]   |
| 449.2453   | 449.2466        | 2.92      | 1        | 124.81    | C27H41NO5Si | (M+NH4)+[-C4H8] |
| 454.2019   | 454.202         | 0.22      | 1        | 95533.08  | C27H41NO5Si | (M+Na)+[-C4H8]  |
| 488.2825   | 488.2827        | 0.31      | 1        | 451490.63 | C27H41NO5Si | (M+H)+          |
| 489.2857   | 489.2855        | -0.5      | 1        | 161447.64 | C27H41NO5Si | (M+H)+          |
| 490.2862   | 490.2854        | -1.75     | 1        | 42248.73  | C27H41NO5Si | (M+H)+          |
| 510.2645   | 510.2646        | 0.17      | 1        | 408036.19 | C27H41NO5Si | (M+Na)+         |
| 511.2677   | 511.2674        | -0.53     | 1        | 146797.28 | C27H41NO5Si | (M+Na)+         |
| 512.2679   | 512.2673        | -1.26     | 1        | 38817.13  | C27H41NO5Si | (M+Na)+         |

23 March 2012 10 07.0  
Archive directory: /export/home/calciun/vnmrsys/data  
Sample directory:  
File: PROTON  
Pulse Sequence: s2pu1  
Solvent: CDCl3  
Temp. 25.0 C / 298.1 K  
Mercury-300 "QCNMR2"  
Relax. delay 1.000 sec  
Pulse 45.0 degrees  
Acq. time 3.700 sec  
Width 4788.5 Hz  
8 repetitions  
OBSERVE H1, 299.9403373 MHz  
DATA PROCESSING  
FT size 65536  
Total time 0 min, 40 sec

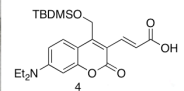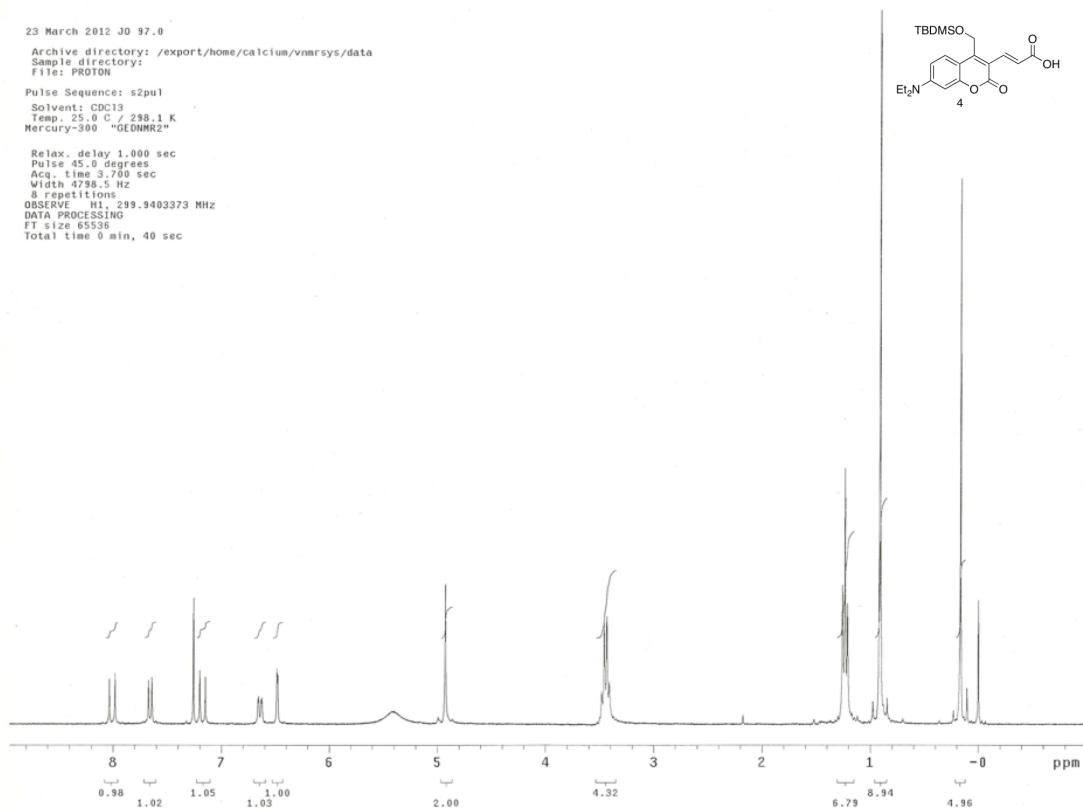



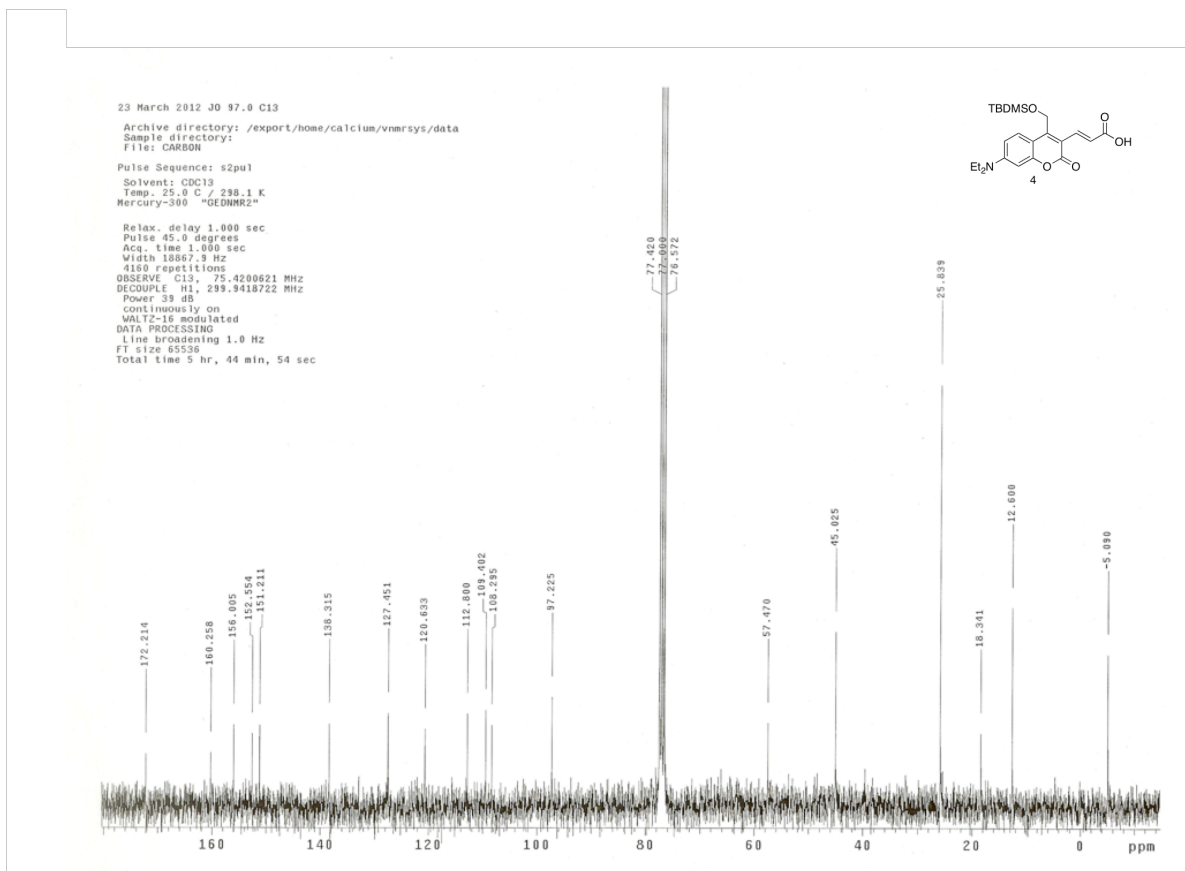

$\times 10^5$  Cpd 1: C23 H33 N O5 Si: +ESI Scan (0.145-0.311 min, 21 Scans) Frag=365.0V MSGDJO04A.d S ...

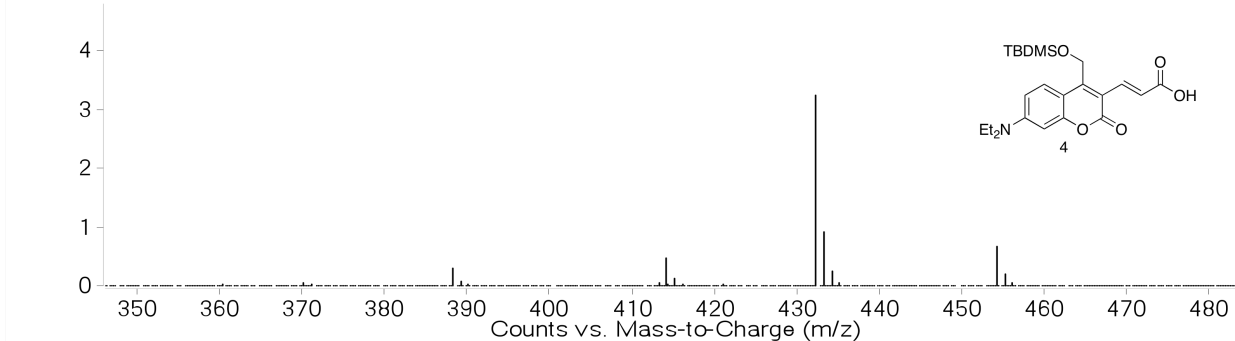

| <i>m/z</i> | Calc <i>m/z</i> | Diff(ppm) | <i>z</i> | Abund     | Formula     | Ion           |
|------------|-----------------|-----------|----------|-----------|-------------|---------------|
| 376.1547   | 376.1575        | 7.5       | 1        | 183.01    | C23H33NO5Si | (M+H)+[-C4H8] |
| 414.2092   | 414.2095        | 0.63      | 1        | 45997.63  | C23H33NO5Si | (M+H)+[-H2O]  |
| 415.2121   | 415.2122        | 0.3       | 1        | 12875.92  | C23H33NO5Si | (M+H)+[-H2O]  |
| 432.2201   | 432.2201        | -0.07     | 1        | 323857.03 | C23H33NO5Si | (M+H)+        |
| 433.2229   | 433.2228        | -0.31     | 1        | 92371.99  | C23H33NO5Si | (M+H)+        |
| 434.223    | 434.2222        | -1.83     | 1        | 24095.42  | C23H33NO5Si | (M+H)+        |
| 454.2018   | 454.202         | 0.42      | 1        | 67524.16  | C23H33NO5Si | (M+Na)+       |
| 455.2047   | 455.2047        | 0.15      | 1        | 19342.42  | C23H33NO5Si | (M+Na)+       |
| 456.2054   | 456.2041        | -2.75     | 1        | 5068.97   | C23H33NO5Si | (M+Na)+       |

24 Feb 2012 00 66.1

Archive directory: /export/home/calciun/vmrsys/data  
Sample directory:  
File: PROTON

Pulse Sequence: s2pu1  
Solvent: CDCl3  
Temp. 25.0 C / 298.1 K  
Mercury-300 "GEMMR2"

Relax. delay 1.000 sec  
Pulse 45.0 degrees  
Acq. time 3.700 sec  
Width 4798.5 Hz  
8 repetitions  
OBSERVE H1, 299.9403322 MHz  
DATA PROCESSING  
FT size 65536  
Total time 0 min, 40 sec

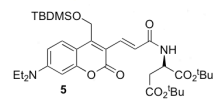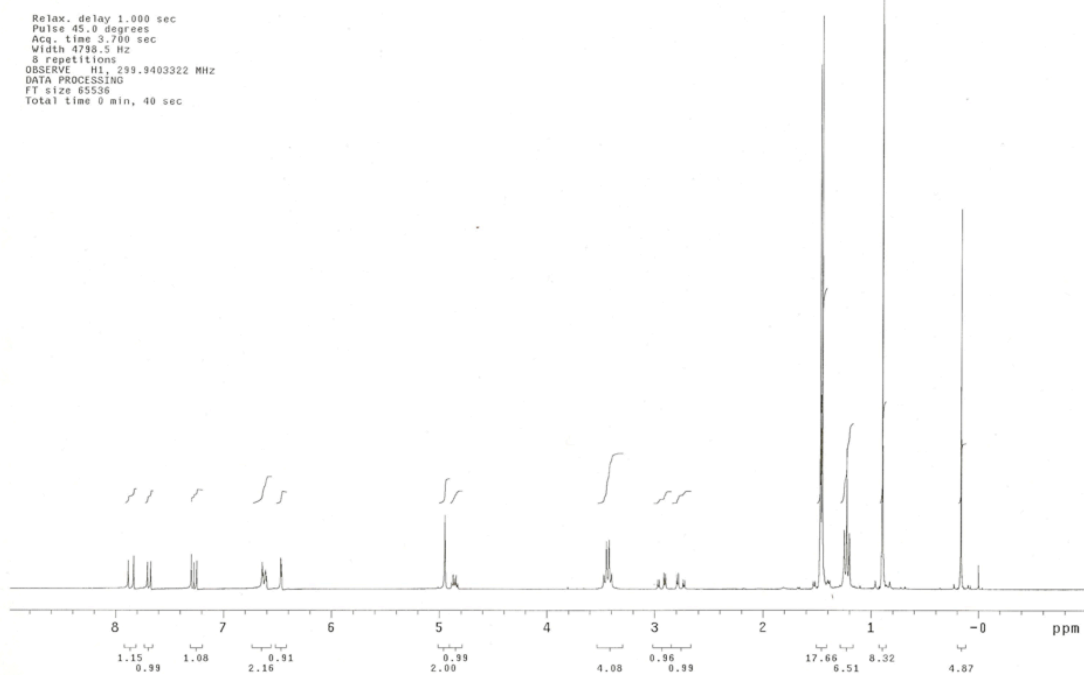

24 Feb 2012 J0 66.1 C13  
 Archive directory: /export/home/calium/vmarsys/data  
 Sample directory:  
 File: CARBON  
 Pulse Sequence: s2pu1  
 Solvent: CDCl3  
 Temp: 25.0 C / 298.1 K  
 Mercury-300 "GEDNMR2"

Relax. delay 1.000 sec  
 Pulse 45.0 degrees  
 Acq. time 1.000 sec  
 Width 18867.3 Hz  
 4006 repetitions  
 OBSERVE C13, 75.4200644 MHz  
 DECOUPLE H1, 299.9418722 MHz  
 Power 39 dB  
 continuously on  
 WALTZ-16 modulated  
 DATA PROCESSING  
 Line broadening 1.0 Hz  
 FT size 65536  
 Total time 2 hr, 52 min, 28 sec

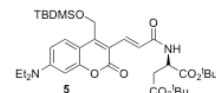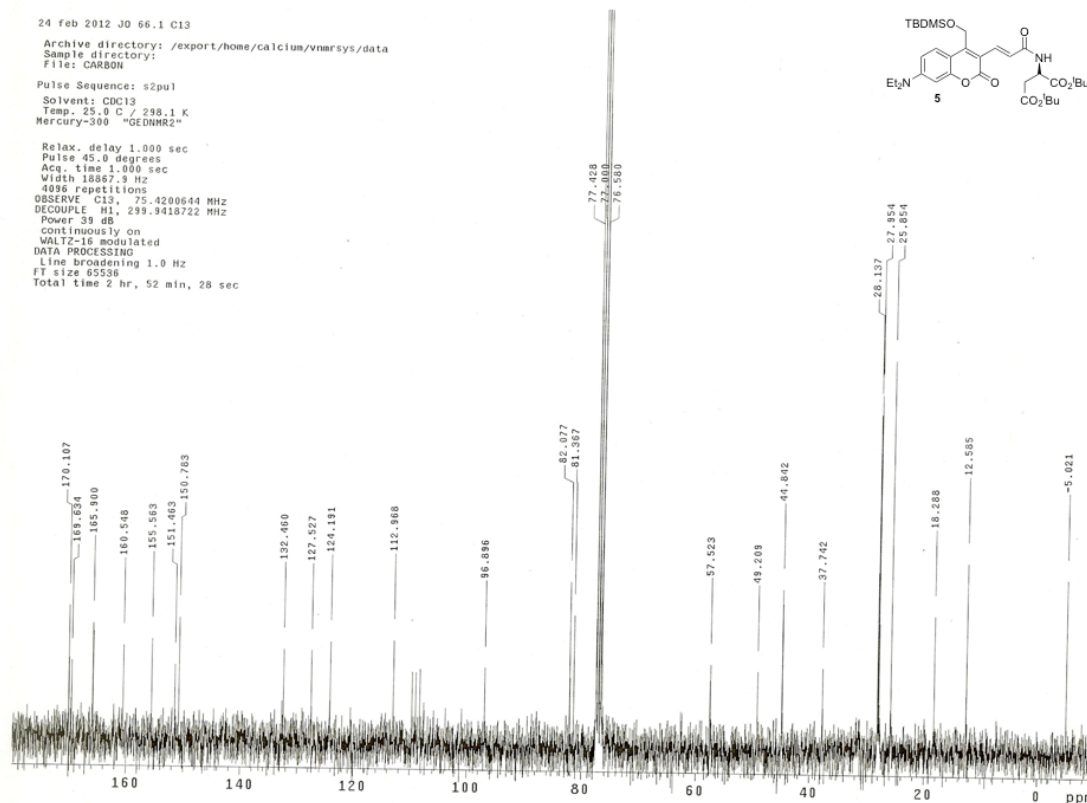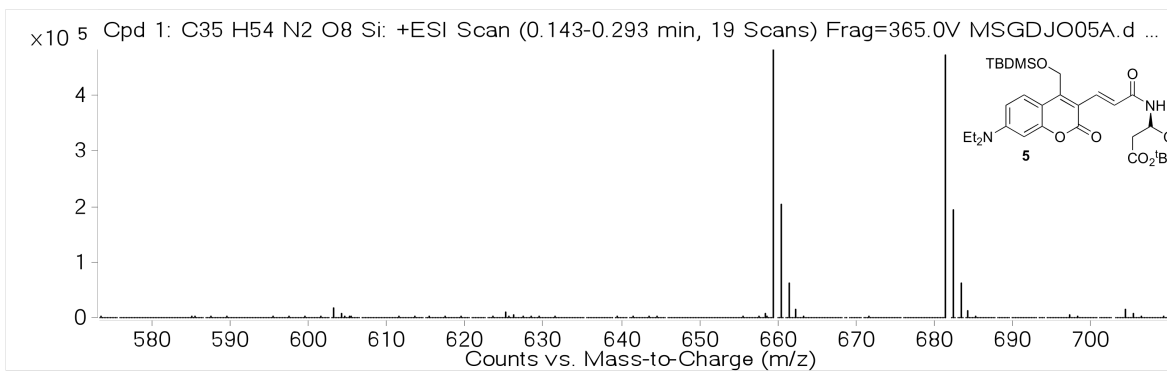

| m/z      | Calc m/z | Diff(ppm) | z | Abund     | Formula                                                          | Ion                                      |
|----------|----------|-----------|---|-----------|------------------------------------------------------------------|------------------------------------------|
| 603.3094 | 603.3096 | 0.42      | 1 | 16432.81  | C <sub>35</sub> H <sub>54</sub> N <sub>2</sub> O <sub>8</sub> Si | (M+H)+[-C <sub>4</sub> H <sub>8</sub> ]  |
| 625.2915 | 625.2916 | 0.05      | 1 | 9437.64   | C <sub>35</sub> H <sub>54</sub> N <sub>2</sub> O <sub>8</sub> Si | (M+Na)+[-C <sub>4</sub> H <sub>8</sub> ] |
| 659.3723 | 659.3722 | -0.14     | 1 | 482210.13 | C <sub>35</sub> H <sub>54</sub> N <sub>2</sub> O <sub>8</sub> Si | (M+H)+                                   |
| 660.3756 | 660.3751 | -0.82     | 1 | 203887.36 | C <sub>35</sub> H <sub>54</sub> N <sub>2</sub> O <sub>8</sub> Si | (M+H)+                                   |
| 661.3763 | 661.3758 | -0.74     | 1 | 62016.17  | C <sub>35</sub> H <sub>54</sub> N <sub>2</sub> O <sub>8</sub> Si | (M+H)+                                   |
| 662.3775 | 662.3773 | -0.35     | 1 | 13959.85  | C <sub>35</sub> H <sub>54</sub> N <sub>2</sub> O <sub>8</sub> Si | (M+H)+                                   |
| 681.3543 | 681.3542 | -0.17     | 1 | 473281.03 | C <sub>35</sub> H <sub>54</sub> N <sub>2</sub> O <sub>8</sub> Si | (M+Na)+                                  |
| 682.3576 | 682.357  | -0.87     | 1 | 194359.84 | C <sub>35</sub> H <sub>54</sub> N <sub>2</sub> O <sub>8</sub> Si | (M+Na)+                                  |
| 683.3586 | 683.3577 | -1.31     | 1 | 60960.01  | C <sub>35</sub> H <sub>54</sub> N <sub>2</sub> O <sub>8</sub> Si | (M+Na)+                                  |
| 684.3597 | 684.3592 | -0.66     | 1 | 13206.08  | C <sub>35</sub> H <sub>54</sub> N <sub>2</sub> O <sub>8</sub> Si | (M+Na)+                                  |

27 Feb 2012 J0 68.1

Archive directory: /export/home/calcium/vnmrsys/data  
Sample directory:  
File: PROTON

Pulse Sequence: s2pul  
Solvent: CDCl3  
Temp: 25.0 C / 298.1 K  
Mercury-300 "QDORR2"

Relax. delay 1.000 sec  
Pulse 45.0 degrees  
Acq. time 3.700 sec  
Width 4798.5 Hz  
8 repetitions  
OBSERVE H1, 299.9403354 MHz  
DATA PROCESSING  
FT size 85536  
Total time 0 min, 40 sec

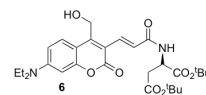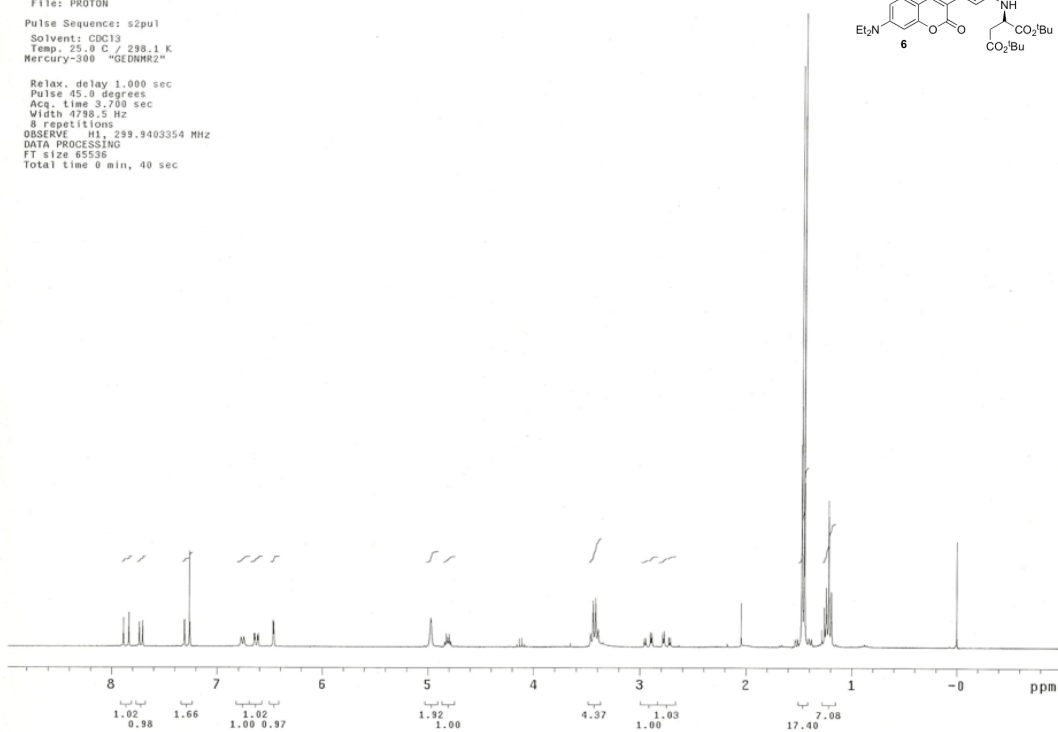

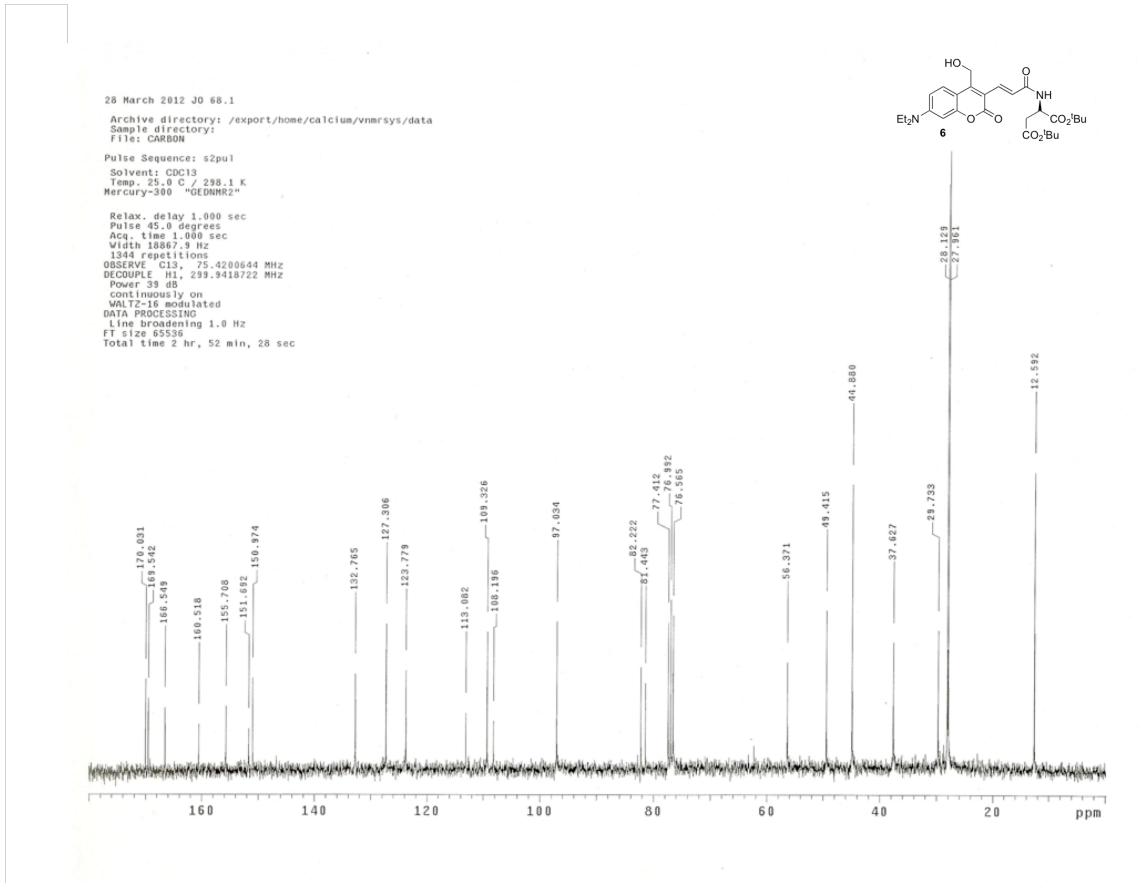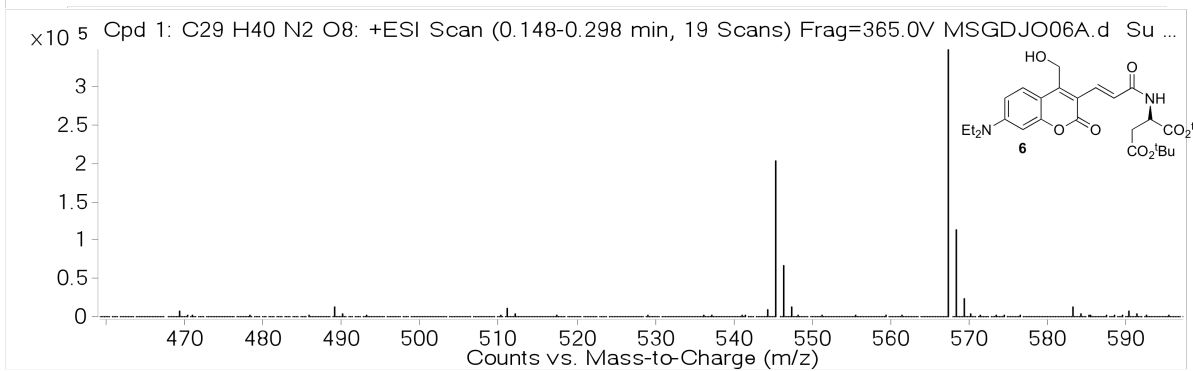

| m/z      | Calc m/z | Diff(ppm) | z | Abund     | Formula                                                       | Ion                                      |
|----------|----------|-----------|---|-----------|---------------------------------------------------------------|------------------------------------------|
| 489.223  | 489.2231 | 0.32      | 1 | 12406.19  | C <sub>29</sub> H <sub>40</sub> N <sub>2</sub> O <sub>8</sub> | (M+H)+[-C <sub>4</sub> H <sub>8</sub> ]  |
| 511.2051 | 511.2051 | 0.03      | 1 | 11571.46  | C <sub>29</sub> H <sub>40</sub> N <sub>2</sub> O <sub>8</sub> | (M+Na)+[-C <sub>4</sub> H <sub>8</sub> ] |
| 545.2859 | 545.2857 | -0.32     | 1 | 203309.16 | C <sub>29</sub> H <sub>40</sub> N <sub>2</sub> O <sub>8</sub> | (M+H)+                                   |
| 546.2887 | 546.289  | 0.63      | 1 | 66083.05  | C <sub>29</sub> H <sub>40</sub> N <sub>2</sub> O <sub>8</sub> | (M+H)+                                   |
| 547.2913 | 547.2917 | 0.68      | 1 | 12965.54  | C <sub>29</sub> H <sub>40</sub> N <sub>2</sub> O <sub>8</sub> | (M+H)+                                   |
| 549.2608 | 549.2571 | -6.78     | 1 | 58.1      | C <sub>29</sub> H <sub>40</sub> N <sub>2</sub> O <sub>8</sub> | (M+Na)+[-H <sub>2</sub> O]               |
| 567.2679 | 567.2677 | -0.44     | 1 | 349545.22 | C <sub>29</sub> H <sub>40</sub> N <sub>2</sub> O <sub>8</sub> | (M+Na)+                                  |
| 568.2712 | 568.271  | -0.4      | 1 | 113176.71 | C <sub>29</sub> H <sub>40</sub> N <sub>2</sub> O <sub>8</sub> | (M+Na)+                                  |
| 569.2734 | 569.2737 | 0.4       | 1 | 23671.89  | C <sub>29</sub> H <sub>40</sub> N <sub>2</sub> O <sub>8</sub> | (M+Na)+                                  |
| 570.2772 | 570.2763 | -1.45     | 1 | 3716.38   | C <sub>29</sub> H <sub>40</sub> N <sub>2</sub> O <sub>8</sub> | (M+Na)+                                  |

19 March 2012 10 09.1

Archive directory: /export/home/calciun/vnmrsys/data  
Sample directory:  
File: PROTON

Pulse Sequence: s2pu1  
Solvent: CDCl3  
Temp: 25.0 C / 298.1 K  
Mercury-300 "GENDMR2"

Relax. delay 1.000 sec  
Pulse 45.0 degrees  
Acq. time 3.700 sec  
Width 4798.5 Hz  
8 repetitions  
OBSERVE H1, 299.9403373 MHz  
DATA PROCESSING  
FT size 65536  
Total time 0 min, 40 sec

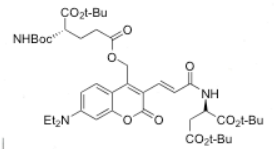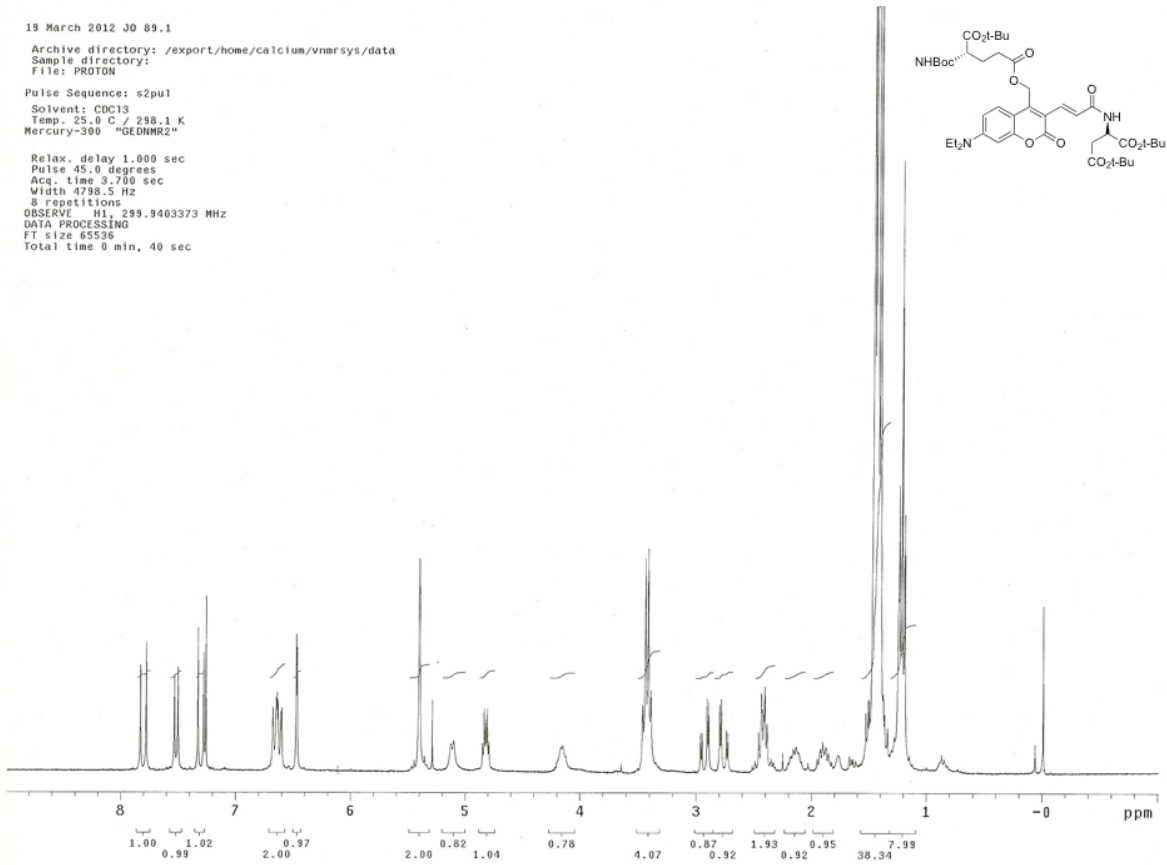

19 March 2012 J0 89.1 C13  
 Archive directory: /export/home/calciun/vnmrsvs/data  
 Sample directory:  
 File: CARBON  
 Pulse Sequence: s2pu1  
 Solvent: CDCl3  
 Temp: 25.0 C / 298.1 K  
 Mercury-300 "GEMMR2"  
 Relax. delay 1.000 sec  
 Pulse 45.0 degrees  
 Acq. time 1.000 sec  
 Width 18867.3 Hz  
 896 repetitions  
 OBSERVE C13, 75.4200696 MHz  
 DECOUPLE H1, 299.9418722 MHz  
 Power 33 db  
 continuously on  
 WALTZ-16 modulated  
 DATA PROCESSING  
 Line broadening 1.0 Hz  
 FT size 65536  
 Total time 5 hr, 44 min, 54 sec

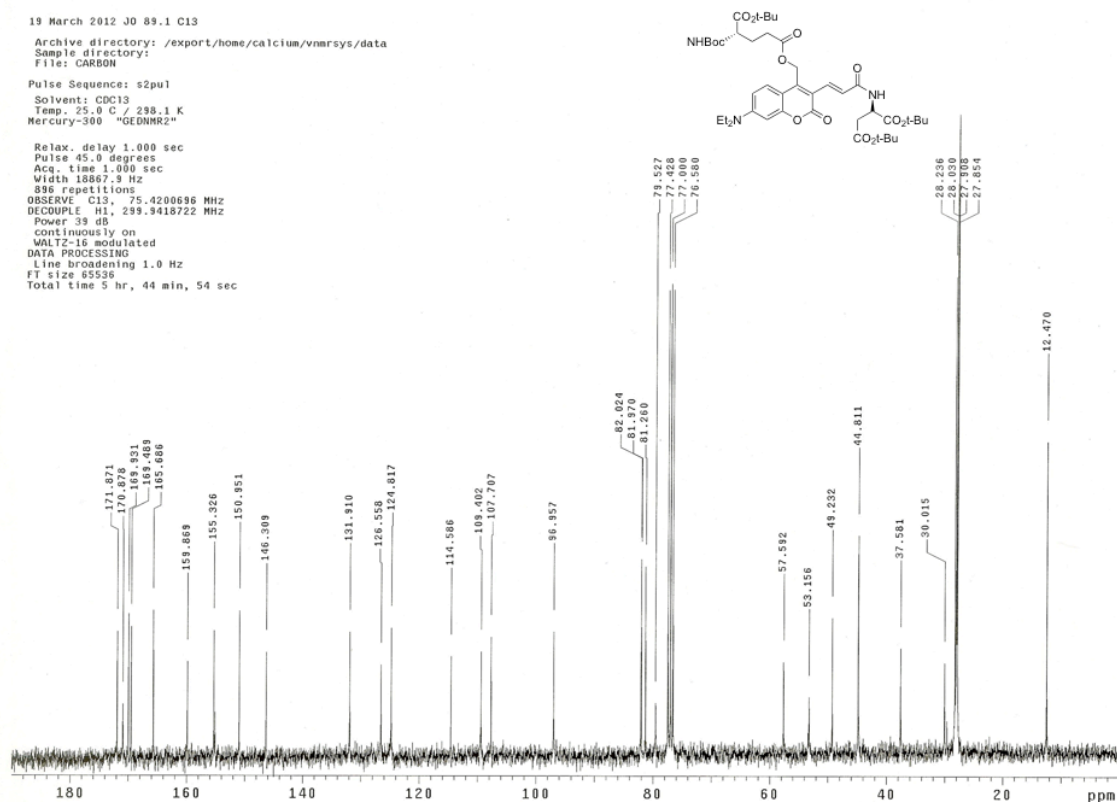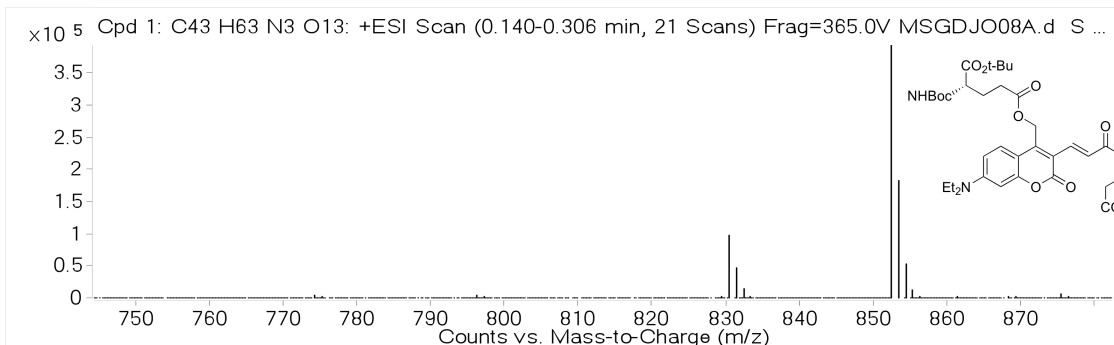

| m/z      | Calc m/z | Diff(ppm) | z | Abund     | Formula     | Ion             |
|----------|----------|-----------|---|-----------|-------------|-----------------|
| 774.3801 | 774.3808 | 0.81      | 1 | 3612.93   | C43H63N3O13 | (M+H)+[-C4H8]   |
| 791.4072 | 791.4073 | 0.12      | 1 | 54.12     | C43H63N3O13 | (M+NH4)+[-C4H8] |
| 796.3621 | 796.3627 | 0.81      | 1 | 4861.2    | C43H63N3O13 | (M+Na)+[-C4H8]  |
| 830.4437 | 830.4434 | -0.43     | 1 | 97661.36  | C43H63N3O13 | (M+H)+          |
| 831.4469 | 831.4466 | -0.27     | 1 | 46513.77  | C43H63N3O13 | (M+H)+          |
| 832.4492 | 832.4495 | 0.29      | 1 | 13576.81  | C43H63N3O13 | (M+H)+          |
| 852.4259 | 852.4253 | -0.67     | 1 | 392735.69 | C43H63N3O13 | (M+Na)+         |
| 853.4296 | 853.4286 | -1.17     | 1 | 182556.56 | C43H63N3O13 | (M+Na)+         |
| 854.4315 | 854.4314 | -0.05     | 1 | 53162.79  | C43H63N3O13 | (M+Na)+         |
| 855.4336 | 855.4341 | 0.59      | 1 | 11232.95  | C43H63N3O13 | (M+Na)+         |

JO\_96.1

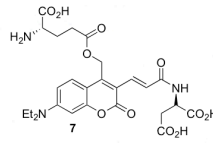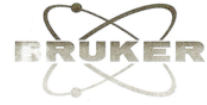

Current Data Parameters  
NAME ged\_id  
EXPNO 7  
PROCNO 1

F2 - Acquisition Parameters  
Date\_ 20120326  
Time 13.22  
INSTRUM spect  
PROBHD 5 mm PABBO BB/  
PULPROG zg  
TD 16384  
SOLVENT MeOD  
NS 9  
DS 4  
SARH 10000.000 Hz  
FIDRES 0.610352 Hz  
AQ 0.8193000 sec  
RG 128  
DM 50.000 usec  
DE 6.00 usec  
TE 293.8 K  
M 1.00000000 sec  
TD0 1

CHANNEL f1  
NUC1 1H  
P1 8.00 usec  
PL1 0.00 dB  
SFO1 600.1528209 MHz

F2 - Processing parameters  
SI 16384  
SF 600.1500153 MHz  
WDW EM  
SSB 0  
LB 0.50 Hz  
GB 0  
PC 1.00

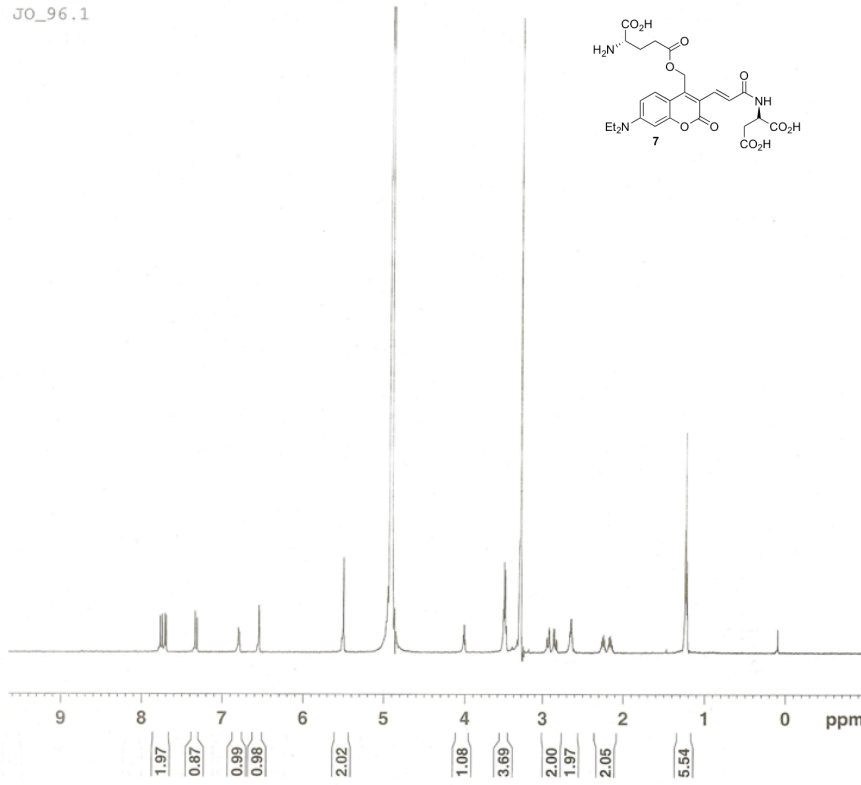



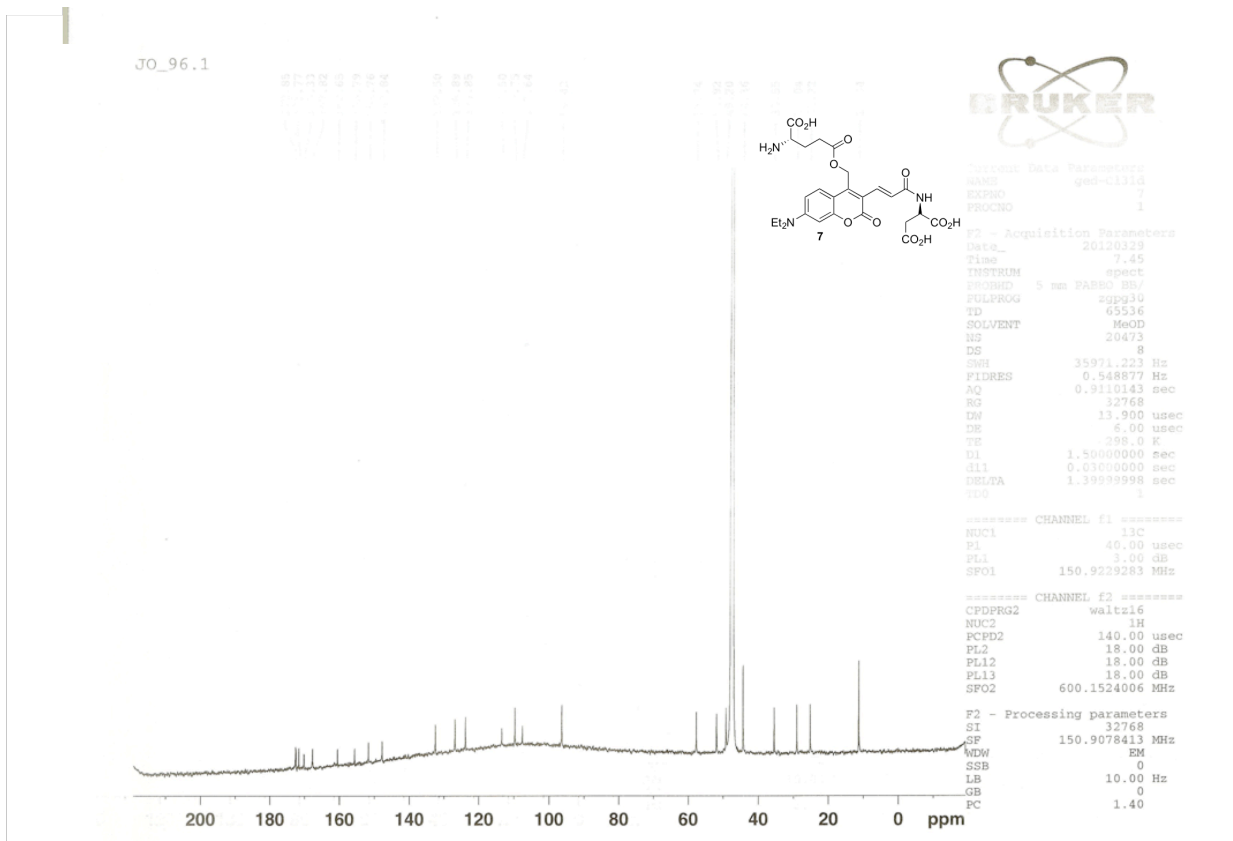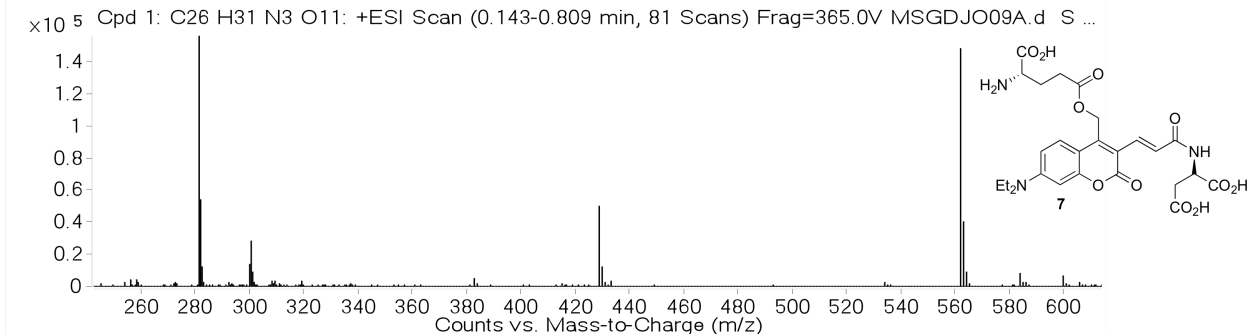

| m/z      | Calc m/z | Diff(ppm) | z | Abund     | Formula     | Ion            |
|----------|----------|-----------|---|-----------|-------------|----------------|
| 272.6001 | 272.5999 | -0.72     | 2 | 2127.98   | C26H31N3O11 | (M+2H)+2[-H2O] |
| 281.6059 | 281.6052 | -2.34     | 2 | 156107.64 | C26H31N3O11 | (M+2H)+2       |
| 282.1076 | 282.1068 | -2.69     | 2 | 53732.11  | C26H31N3O11 | (M+2H)+2       |
| 282.6085 | 282.608  | -1.84     | 2 | 11992.53  | C26H31N3O11 | (M+2H)+2       |
| 303.5855 | 303.5872 | 5.55      | 2 | 191.8     | C26H31N3O11 | (M+2Na)+2      |
| 544.1919 | 544.1926 | 1.25      | 1 | 281.18    | C26H31N3O11 | (M+H)+[-H2O]   |
| 562.2033 | 562.2031 | -0.31     | 1 | 148008.63 | C26H31N3O11 | (M+H)+         |
| 563.2063 | 563.2063 | 0.06      | 1 | 40599.27  | C26H31N3O11 | (M+H)+         |
| 564.2087 | 564.2088 | 0.16      | 1 | 9189.3    | C26H31N3O11 | (M+H)+         |
| 584.1842 | 584.1851 | 1.57      | 1 | 7657.34   | C26H31N3O11 | (M+Na)+        |
